# Supplementary material for: SELEX tool: a novel and convenient gel-based diffusion method for monitoring of aptamer-target binding
Source: PubMed Central journal article supplement (PMC6956507; doi:10.1186/s13036-019-0223-y), 2020-01-13
Supplement: 13036_2019_223_MOESM1_ESM.pdf [file 13036_2019_223_MOESM1_ESM.pdf]

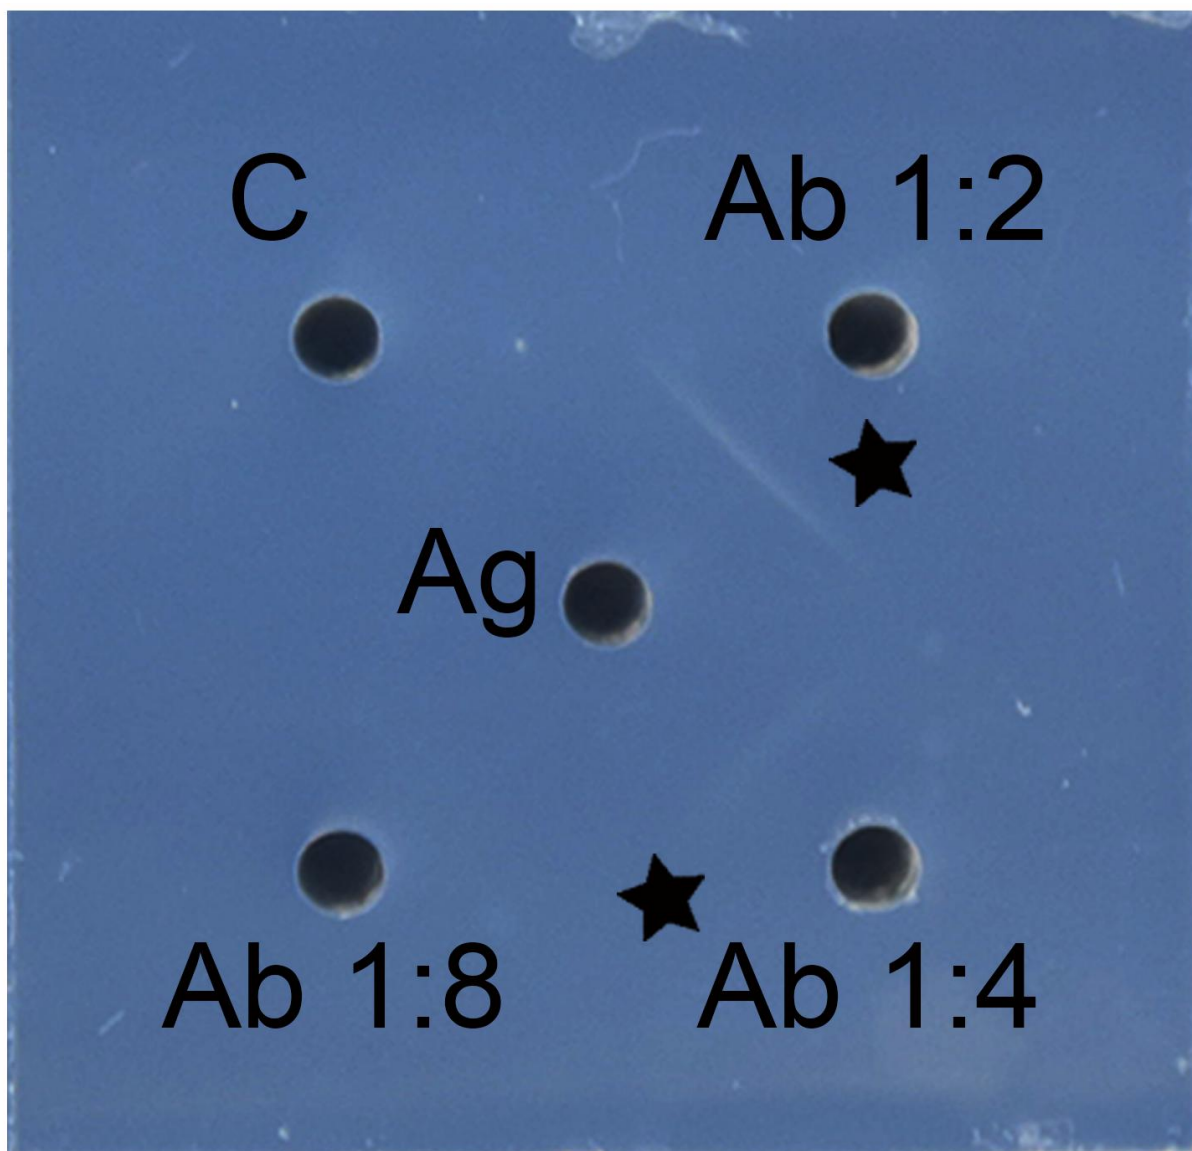

**Additional file 1 Figure S1**
