# Supplementary material for: SELEX tool: a novel and convenient gel-based diffusion method for monitoring of aptamer-target binding
Source: PubMed Central journal article supplement (PMC6956507; doi:10.1186/s13036-019-0223-y), 2020-01-13
Supplement: 13036_2019_223_MOESM7_ESM.pdf [file 13036_2019_223_MOESM7_ESM.pdf]

Binding buffer

Acetamiprid

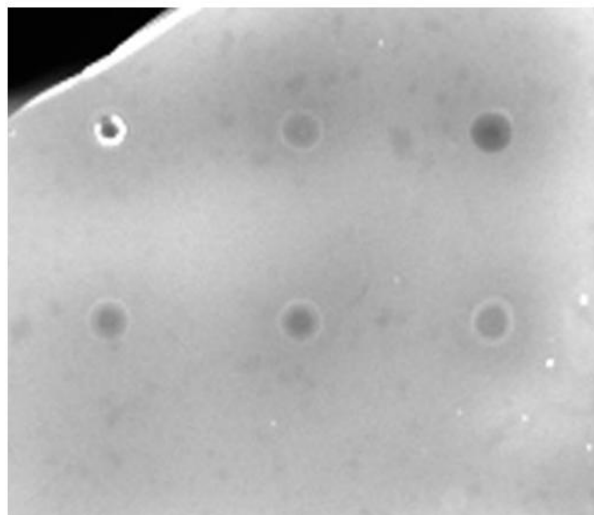

**Additional file 7 Figure S6**

Note: The abnormal high intensity spot at the top left well was caused by a bubble.
